# Supplementary material
Source: PubMed Central journal article supplement (PMC9905221)

## Online Repository

### **Human PD-1 agonist treatment alleviates neutrophilic asthma by reprogramming T cells**

Authors: Doumet Georges Helou, PhD<sup>1</sup>, Christine Quach, MS<sup>1</sup>, Marshall Fung, MS<sup>1</sup>, Jacob D. Painter, MS<sup>1</sup>, Benjamin P. Hurrell, PhD<sup>1</sup>, Yong-Hwee Eddie Loh, PhD<sup>2</sup>, Emily Howard, BS<sup>1</sup>, Pedram Shafiei-Jahani, MS<sup>1</sup>, Pejman Soroosh, PhD<sup>3</sup>, Arlene H. Sharpe, PhD<sup>4</sup>, and Omid Akbari, PhD<sup>1\*</sup>

#### **Affiliations:**

<sup>1</sup> Department of Molecular Microbiology and Immunology, Keck School of Medicine, University of Southern California, Los Angeles, CA, USA

<sup>2</sup> USC Libraries Bioinformatics Service, University of Southern California, Los Angeles, CA, USA

<sup>3</sup> Janssen Research and Development, San Diego, CA, USA

<sup>4</sup> Department of Immunology, Harvard Medical School, Boston, MA, USA.

#### **\*Corresponding author:**

Omid Akbari, Ph.D., University of Southern California, Keck School of Medicine, Department of Molecular Microbiology and Immunology, NRT 5505, 1450 Biggy St, Los Angeles, California 90033-9605, Tel: 323 442 7930, Fax: 3234421721, Email: akbari@usc.edu

## Figure Legends:

Figure E1: Dexamethasone treatment does not reduce neutrophilic lung inflammation in WT and PD-1 KO mice

(A) WT and PD-1 KO mice were sensitized via *s.c.* tail base injection of HDM (200  $\mu$ g) mixed in CFA (1:1 v/v). After 13 days, mice were *i.n.* challenged with HDM (100  $\mu$ g) and were treated or not at day 14 with Dexamethasone (1 mg/Kg) via the intraperitoneal route. On day 15, BAL was collected.

(B) Absolute count of CD45<sup>+</sup> cells, (C) T cells, and (D) neutrophils.

Data are representative of at least 2 independent experiments and are presented as means  $\pm$  SEM (n=5, n.s. non-significant).

Figure E2: Gating strategy of main CD45<sup>+</sup> cells in the BAL and lungs.

(A) Representative flow cytometry plots showing the gating strategy of neutrophils, alveolar macrophages, eosinophils, T and B cells in the BAL.

(B) Representative flow cytometry plots showing the gating strategy of neutrophils, macrophages and DCs in the lungs.

Figure E3: The lack of PD-1 potentiates the production of IL-5 and IL-13 in the lungs

WT and PD-1 KO mice were sensitized via *s.c.* tail base injection of HDM (200  $\mu$ g) mixed in CFA (1:1 v/v). After 13 days, mice were *i.n.* challenged with HDM (100  $\mu$ g). Control mice received PBS only. On day 14, the BAL was collected to measure cytokines.

(A) Levels of IL-5 and (B) IL-13 quantified in the BAL using the LEGENDplex bead-based immunoassay.

Data are representative of at least 2 independent experiments and are presented as means  $\pm$  SEM (two-tailed Student's t-test; n=5; \*P < .05, \*\*P < .01, \*\*\*P < .001, n.s. non-significant).

Figure E4: HDM challenge induces the expression of PD-1 on a population of pulmonary immune cells.

BALB/cByJ mice (WT) mice were sensitized via subcutaneous (*s.c.*) tail base injection of HDM (200  $\mu$ g) mixed in CFA (1:1 v/v). After 13 days, mice were intranasally (*i.n.*) challenged with HDM (100  $\mu$ g). Control mice received PBS only. On day 14, lungs were collected after euthanasia for flow cytometry staining. The figure shows representative flow cytometry plots of PD-1 induction on pulmonary CD45<sup>+</sup> cells from WT mice.

Figure E5: PD-1 agonist treatment reduces the levels of IL-17A and Th2 cytokines in the lungs

(A) Humanized PD-1 mice were sensitized via *s.c.* tail base injection of HDM (200  $\mu$ g) mixed in CFA (1:1 v/v). After 13 days, mice were *i.n.* challenged with HDM (100  $\mu$ g) and received 500  $\mu$ g of PD-1 agonist via the intraperitoneal route or the corresponding isotype, while the dose was reduced to 250  $\mu$ g via the intravenous route on day 14. Naïve mice were not sensitized, challenged, or treated. On day 15, BAL and lungs were collected after euthanasia.

(A) Levels of IL-4, (B) IL-5 and (C) IL-13 quantified in the BAL using the LEGENDplex bead-based immunoassay.

(D) Levels of IL-17A, (E) G-CSF, (F) GM-CSF, and (G) IL-10 quantified in the lung lysates.

Data are representative of at least 2 independent experiments and are presented as means  $\pm$  SEM (two-tailed Student's t-test; n=5; \*P < .05, \*\*P < .01, \*\*\*P < .001).

Figure E6: PD-1 agonist treatment reduces the number of main innate immune cells in the lungs.

Humanized PD-1 mice were sensitized via *s.c.* tail base injection of HDM (200 µg) mixed in CFA (1:1 v/v). After 13 days, mice were *i.n.* challenged with HDM (100 µg) and received 500 µg of PD-1 agonist via the intraperitoneal route or the corresponding isotype, while the dose was reduced to 250 µg via the intravenous route on day 14. Naïve mice were not sensitized, challenged, and neither treated. On day 15, lungs were washed and collected after euthanasia.

(A) Absolute count of eosinophils, (B) macrophages, and (C) DCs quantified in lungs using the count precision beads.

Data are representative of at least 2 independent experiments and are presented as means ± SEM (two-tailed Student's t-test; n=4; \*P < .05, \*\*P < .01).

Figure E7: PD-1 is highly expressed on CD44<sup>+</sup> CD4<sup>+</sup> T cells in the lungs.

Humanized PD-1 mice were sensitized via *s.c.* tail base injection of HDM (200 µg) mixed in CFA (1:1 v/v). After 13 days, mice were *i.n.* challenged with HDM (100 µg). On day 15, lungs were washed and collected after euthanasia.

(A) Representative flow cytometry plots showing the gating of CD44<sup>-</sup> and CD44<sup>+</sup> CD4<sup>+</sup> T cells.

(B) PD-1 expression on CD44<sup>-</sup> and CD44<sup>+</sup> CD4<sup>+</sup> T cells, represented as the MFI.

(C) The percentage of PD-1<sup>+</sup> cells in CD44<sup>-</sup> and CD44<sup>+</sup> CD4<sup>+</sup> T cells.

(D) The gating strategy of Treg identified as CD4<sup>+</sup> CD25<sup>+</sup> FOXP3<sup>+</sup> CD4<sup>+</sup> cells.

Data are representative of at least 2 independent experiments and are presented as means ± SEM (two-tailed Student's t-test; n=4; \*\*\*P < .001).

Figure E8: PD-1 agonist does not affect the distribution of CD4<sup>+</sup> T cells in the spleen.

(A) Percentages of effector memory CD4<sup>+</sup> T cells, (B) central memory CD4<sup>+</sup> T cells, (C) naïve CD4<sup>+</sup> T cells, and (D) Teff:Treg ratio in the spleen.

Data are representative of at least 2 independent experiments and are presented as means  $\pm$  SEM (two-tailed Student's t-test; n=4; n.s. non-significant).

Journal Pre-proof

**A.**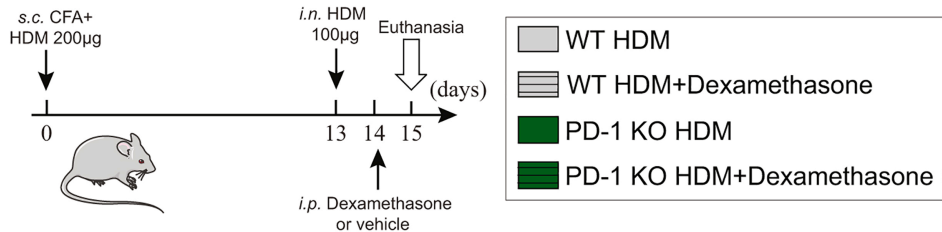**B.**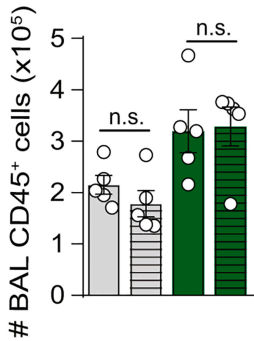**C.**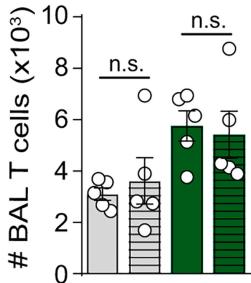**D.**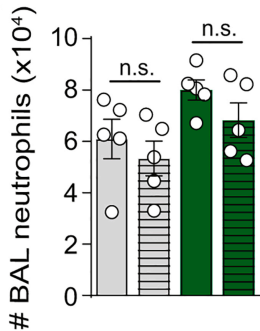

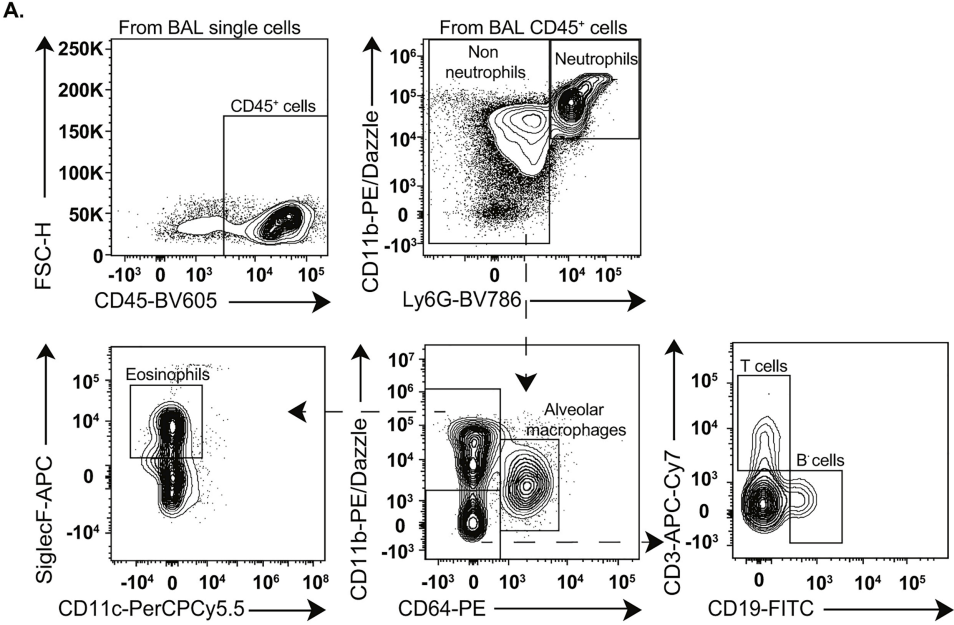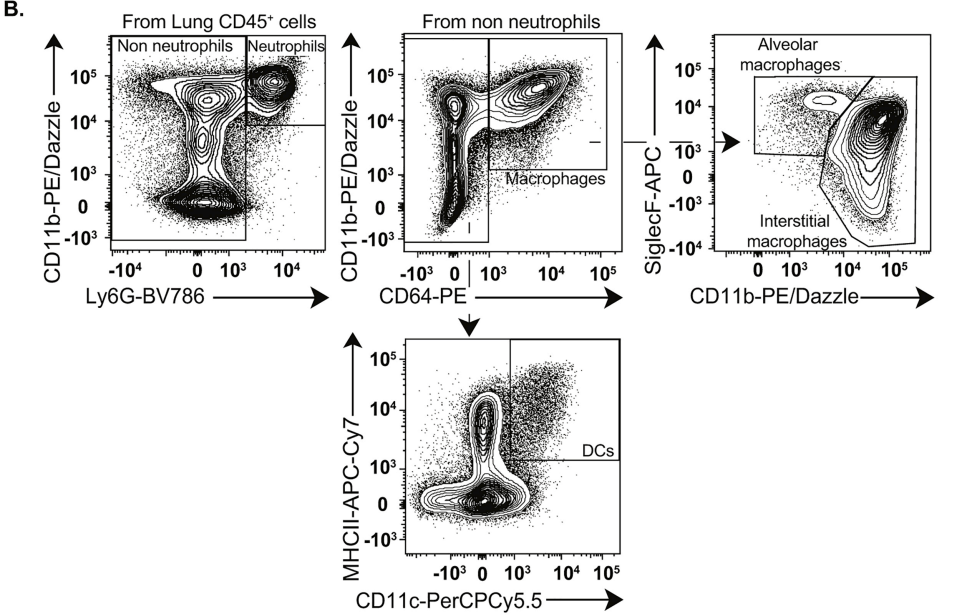

**A.**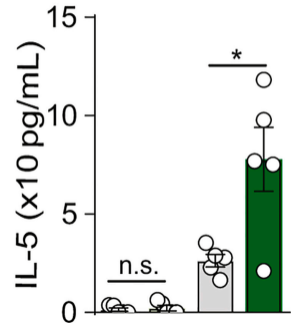**B.**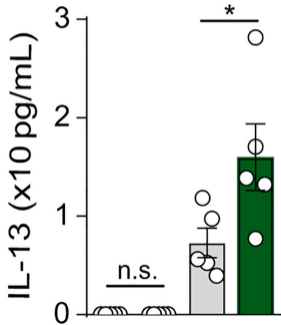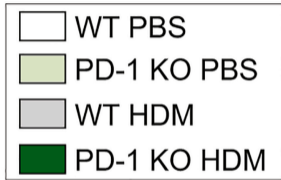



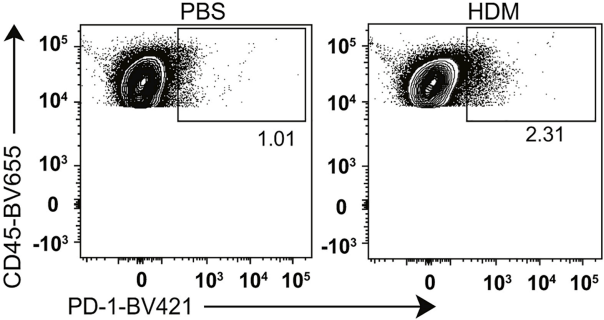

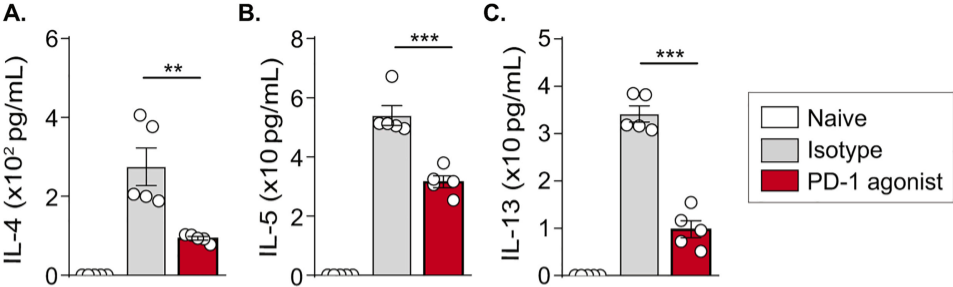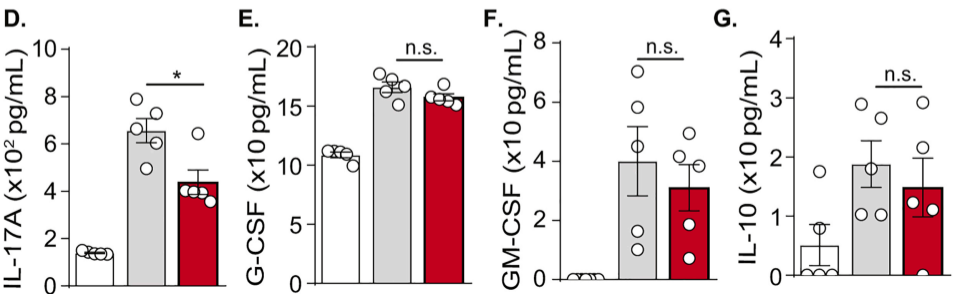

**A.**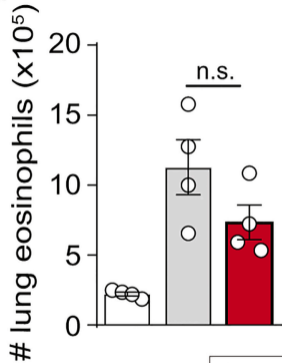**B.**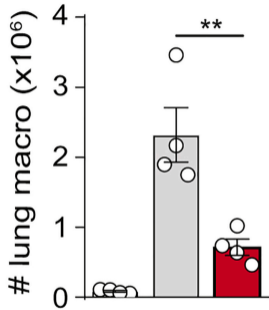**C.**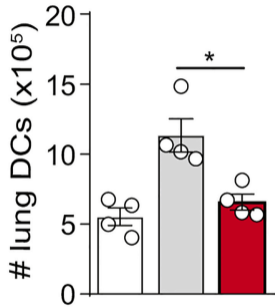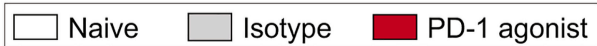

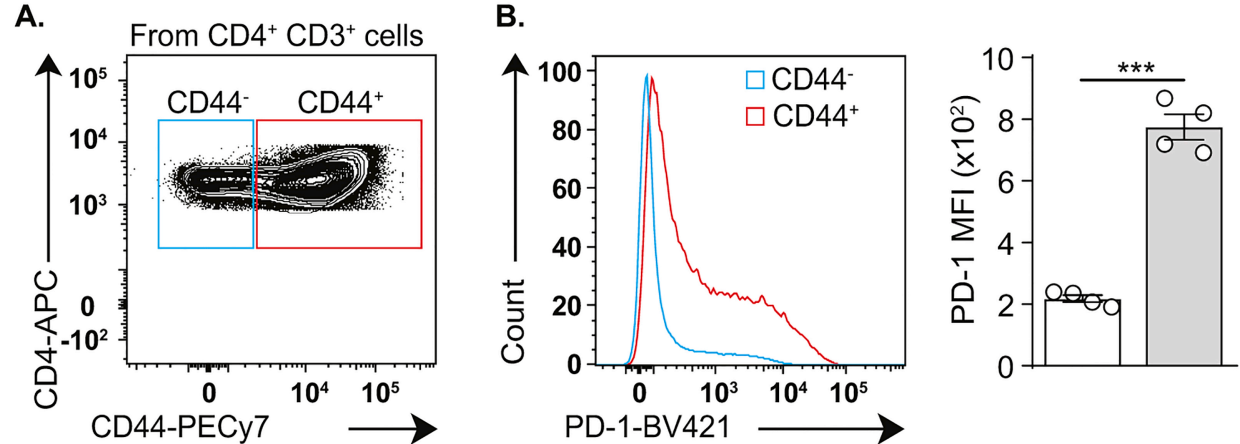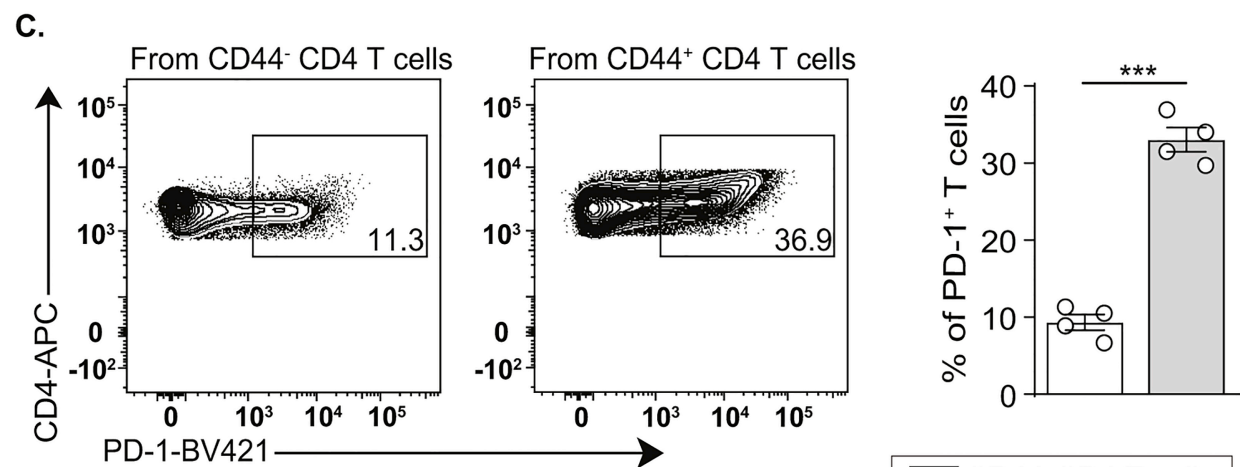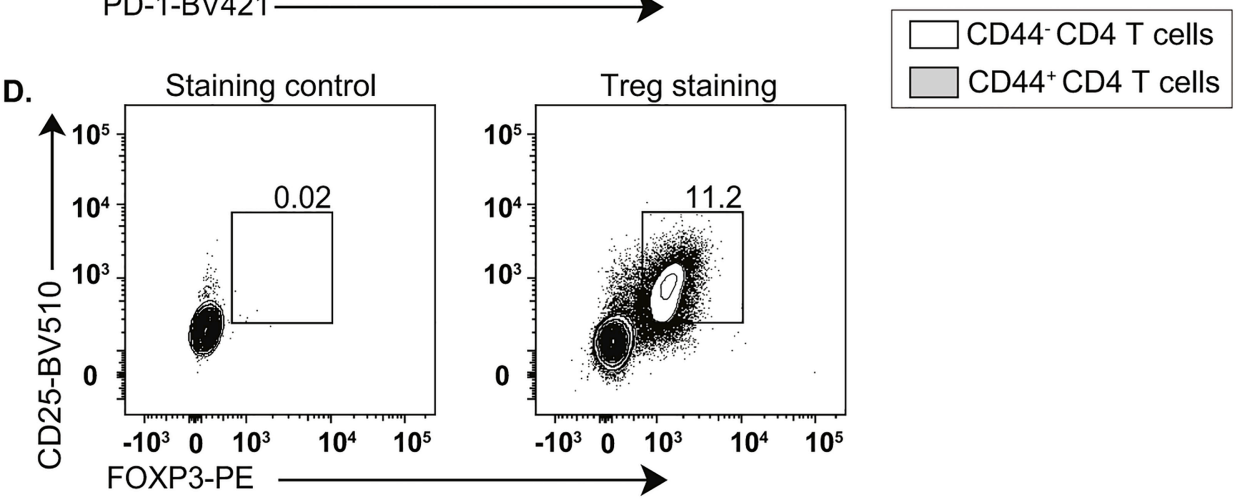

**A.**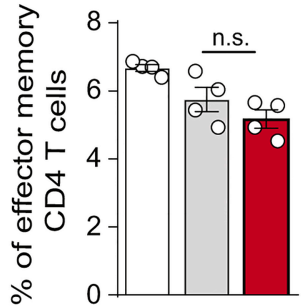**B.**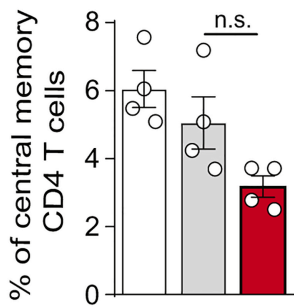**C.**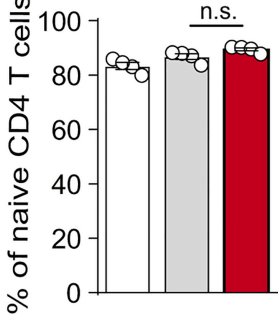**D.**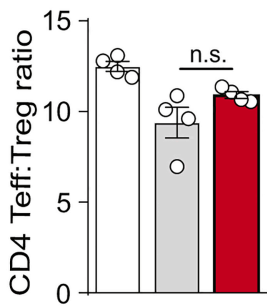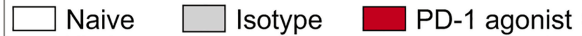

Supplement: NIHMS1829529-supplement-1.pdf [file NIHMS1829529-supplement-1.pdf]
